# Supplementary material
Source: ML conference proceedings conference paper supplement (https://aclanthology.org/2026.americasnlp-6.4)

Repetition ↓ Copy Ratio ↓ Length Ratio Entity F1 ↑

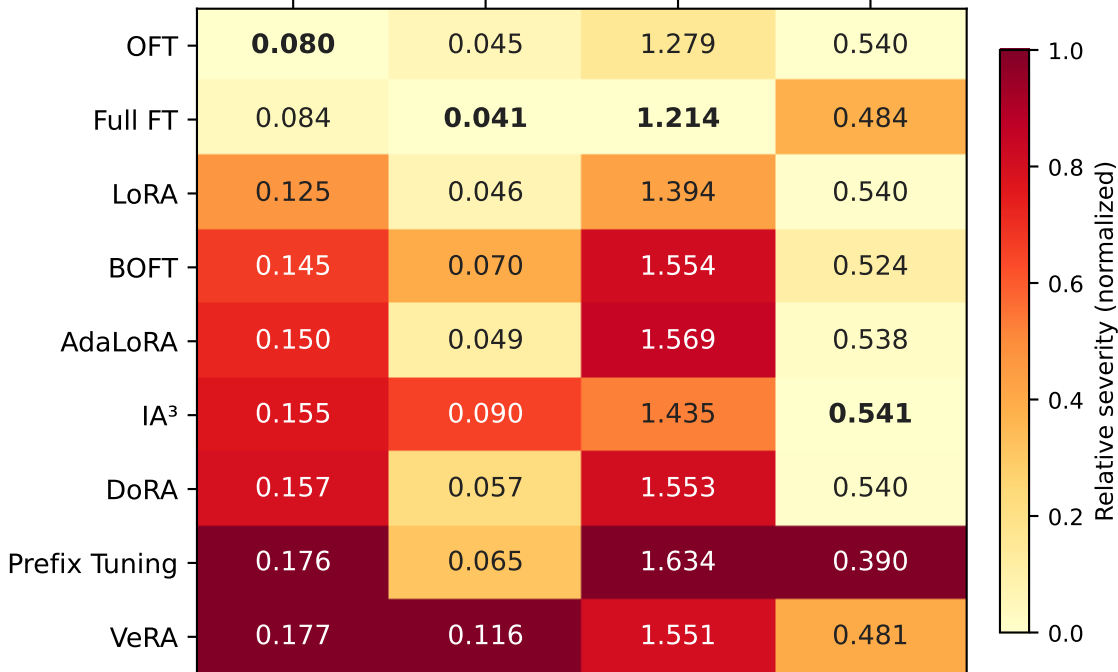

Supplement: SupplementaryMaterial [file failure_heatmap.pdf › latex/figures/failure_heatmap.pdf]

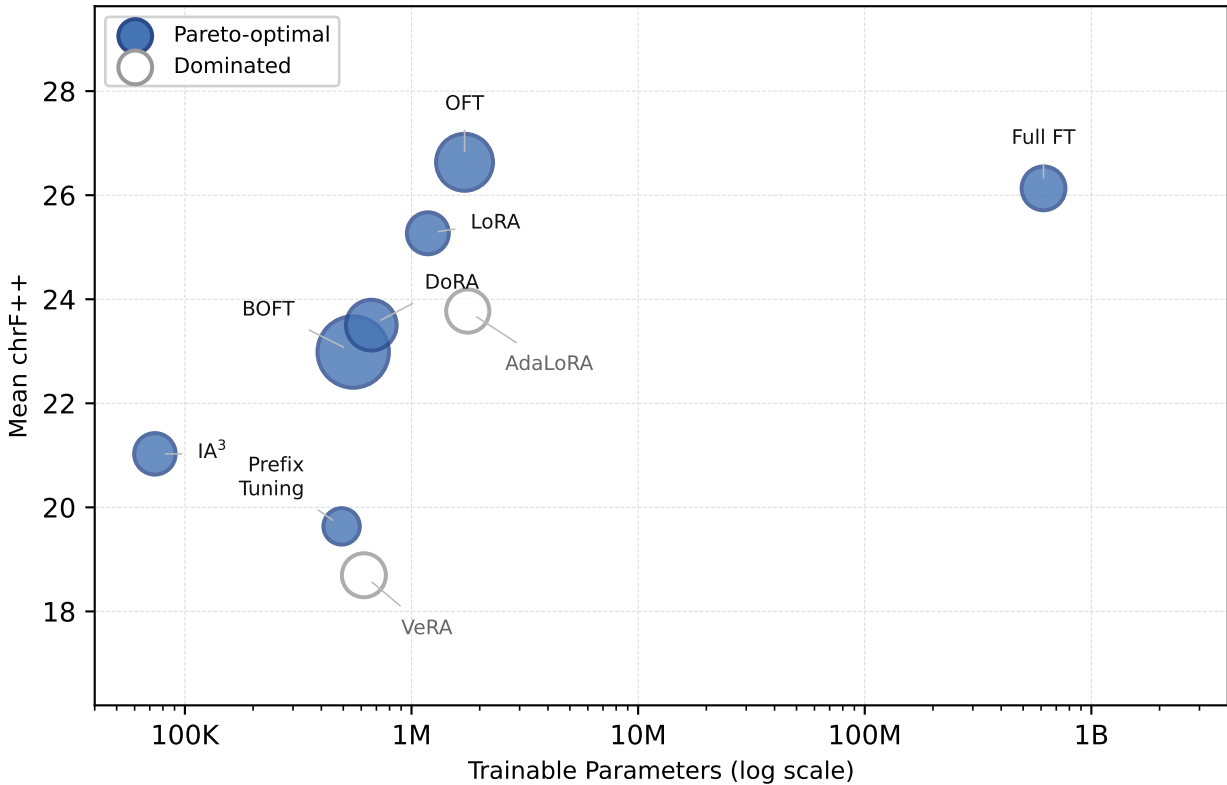

Supplement: SupplementaryMaterial [file pareto.pdf › latex/figures/pareto.pdf]
